# Supplementary material for: Reduced open-circuit voltage deficit in wide-bandgap perovskite solar cells enabled by thiazolidine-based interfacial engineering
Source: Royal Society of Chemistry journal article supplement (doi:10.1039/d3tc01566a), 2023-01-01
Supplement: d3tc01566a1.pdf [file d3tc01566a1.pdf]

## Supporting Information

### **Reduced open-circuit voltage deficit in wide-bandgap perovskite solar cells enabled by thiazolidine-based interfacial engineering**

Guangyao Cui,<sup>a</sup> Xue Zhang,<sup>b</sup> Yu Zhu,<sup>a</sup> Cong Chen,<sup>\*, a</sup> Zhiyu Gao,<sup>a</sup> Juncheng Wang,<sup>a</sup> Guo Xie,<sup>c</sup> Hao Huang,<sup>\*, b</sup> Bingsuo Zou,<sup>b</sup> Dewei Zhao<sup>\*, a</sup>

<sup>a</sup> College of Materials Science and Engineering & Engineering Research Center of Alternative Energy Materials & Devices, Ministry of Education, Sichuan University, Chengdu 610065, China

Email: [chen.cong@scu.edu.cn](mailto:chen.cong@scu.edu.cn); [dewei.zhao@scu.edu.cn](mailto:dewei.zhao@scu.edu.cn)

<sup>b</sup> State Key Laboratory of Featured Metal Materials and Life-cycle Safety for Composite Structures & School of Resources, Environment and Materials, Guangxi University, Nanning 530004, China

Email: [hhuang@gxu.edu.cn](mailto:hhuang@gxu.edu.cn)

<sup>c</sup> State Key Laboratory of Hydraulics and Mountain River Engineering, College of Water Resource & Hydropower, Sichuan University, Chengdu, 610065, China

## Experimental Section

### Materials

N,N-dimethylformamide (DMF), dimethyl sulfoxide (DMSO), chlorobenzene (CB), isopropanol (IPA), Cesium iodide (CsI), and  $\text{Pb}(\text{SCN})_2$  were purchased from Sigma-Aldrich. Diethyl ether (DE) was purchased from Chengdu Chron Chemical Corporation, Ltd.. Lead iodide ( $\text{PbI}_2$ ), formamidinium iodide (FAI), and lead bromide ( $\text{PbBr}_2$ ) were purchased from Advanced Election Technology Co., Ltd. Poly(bis(4-phenyl)(2,4,6-trimethylphenyl)amine) (PTAA) was purchased from Xi'an Polymer Light Technology Corporation.  $\text{C}_{60}$  was purchased from Nano-C, bathocuproine (BCP) was purchased from Jilin OLED and copper (Cu) was purchased from ZhongNuo Advanced Material (Beijing) Technology Co., Ltd. Tetrakis(dimethylamino) tin (IV) (99.9999%) was bought from Nanjing Ai Mou Yuan Scientific Equipment Co., Ltd. All the chemicals were used without further purification.

### Perovskite Precursor Preparation

The 1.2 M  $\text{FA}_{0.8}\text{Cs}_{0.2}\text{Pb}(\text{I}_{0.8}\text{Br}_{0.2})_3$  WBG perovskite precursor was prepared by dissolving 165.12 mg of FAI, 387.24 mg of  $\text{PbI}_2$ , 132.12 mg of  $\text{PbBr}_2$ , and 62.4 mg of CsI in 1 mL mixed solvent of DMF and DMSO with a volume ratio of 3 : 1. An additional 4.8 mg of  $\text{Pb}(\text{SCN})_2$  was introduced to promote grain growth. The precursor solution was stirred at 60 °C for 3 h before use.

### The Fabrication of WBG Perovskite Solar Cells

The ITO substrates were ultrasonically cleaned with detergent, deionized water, and ethanol for 15 min, respectively. Before depositing PTAA (2 mg/mL in CB) hole transport layer (HTL), the ITO substrates were treated with ultraviolet-ozone for 15 min. The ITO substrates were then transferred to the nitrogen-filled glovebox. The PTAA solution was spin-coated on the ITO substrates at 4000 rpm for 30 s, and the substrates were annealed at 100 °C for 10 min. To improve the surface wettability of PTAA HTL, 50  $\mu\text{L}$  DMF was spin-coated at 4000 rpm for 10 s without annealing. To obtain the perovskite film, 60  $\mu\text{L}$  of the perovskite precursor solution was dropped on the pre-wetted substrate and then spin-coated at 500 rpm for 2 s and at 4000 rpm for 60 s with 600  $\mu\text{L}$  diethyl ether dripping at the 25 s of the second step. Then the as-prepared films were annealed at 60 °C for 2 min and 100 °C for 10 min. For the devices with the ThHCl treatment, the ThHCl isopropanol solution at different concentrations of 0.5, 1,

2, and 3 mg/mL was spin-coated on the as-prepared perovskite substrates at 3000 rpm for 30 s, and then the samples were annealed at 100 °C for 5 min. To complete the device fabrication, all the substrates were transferred to the thermal evaporation chamber. 20 nm of C<sub>60</sub>, 5 nm of BCP, and 100 nm of Copper were evaporated successively at 3×10<sup>-4</sup> Pa. For the semitransparent cells, 20 nm of ALD SnO<sub>2</sub> was used instead of BCP. The precursors for ALD SnO<sub>2</sub> were tetrakis(dimethylamino) tin (IV) and deionized water. 120 nm ITO was sputtered under Ar pressure of 2 mTorr. The active area of devices is 0.0975 cm<sup>2</sup>, as defined by the overlapped region between the back electrode and the patterned ITO substrate.

### **Film and Device Characterizations**

WBG perovskites with and without ThHCl treatment were characterized by XRD, (Bruker D2 Phaser) with Cu-K $\alpha$  ( $\lambda = 0.154$  nm) radiation at 30 kV and 10 mA excitation. SEM images were taken with FE-SEM, Regulus-8230, Hitachi. Absorbance spectra of perovskite films were measured by ultraviolet-visible (UV-vis) spectrophotometer (PerkinElmer Lambda 950). PL and TRPL were performed by FLS980 (Edinburgh Inc.) PL and TRPL were measured using a supercontinuum pulsed laser (Wuhan Yangtze Soton Laser Co. Ltd.) with a wavelength of 532 nm. PL mapping was taken by alpha300 Raman Imaging Microscope (WITec). XPS was measured using a photoelectron spectrometer (ESCALAB 250Xi, Thermo Fisher Scientific). *J-V* curves were measured using Keysight B2901A sourcemeter under AM1.5G (100 mW cm<sup>-2</sup>) illumination (Enlitech, SS-F5) in an N<sub>2</sub>-filled glove box. All *J-V* measurements were performed via a mask with an aperture area of 0.0576 cm<sup>2</sup>. The spectral response was measured by a quantum efficiency measurement system (QE-R, Enlitech). The electrochemical impedance spectra (EIS) were recorded on a IviumStat.h electrochemical workstation (Tianjin Deshang Technology Co. Ltd) with a frequency range of 1 MHz - 1 Hz at a bias of 1.0 V at dark. *C-V* measurements were carried out with a voltage scan range of 0 - 1.2 V and a frequency of 1 kHz at dark by using the IviumStat.h electrochemical workstation (Tianjin Deshang Technology Co. Ltd).

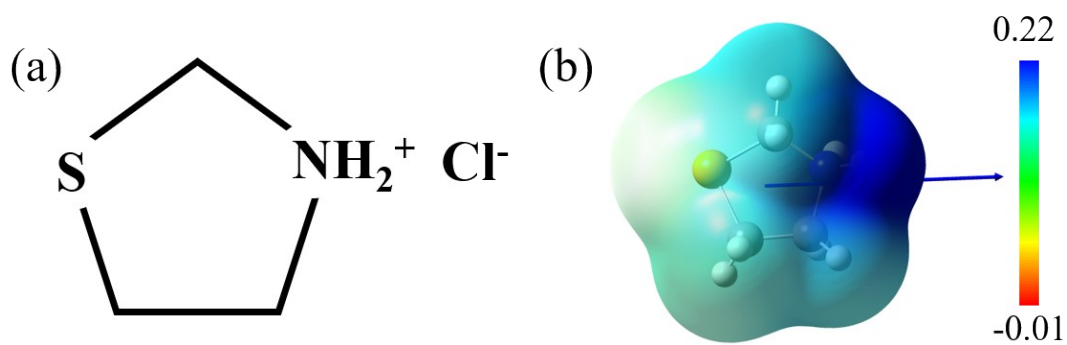

**Fig. S1** (a) Structural formula of 1,3-thiazolidine hydrochloride (ThHCl). (b) Electrostatic potential distribution of ThH<sup>+</sup>.

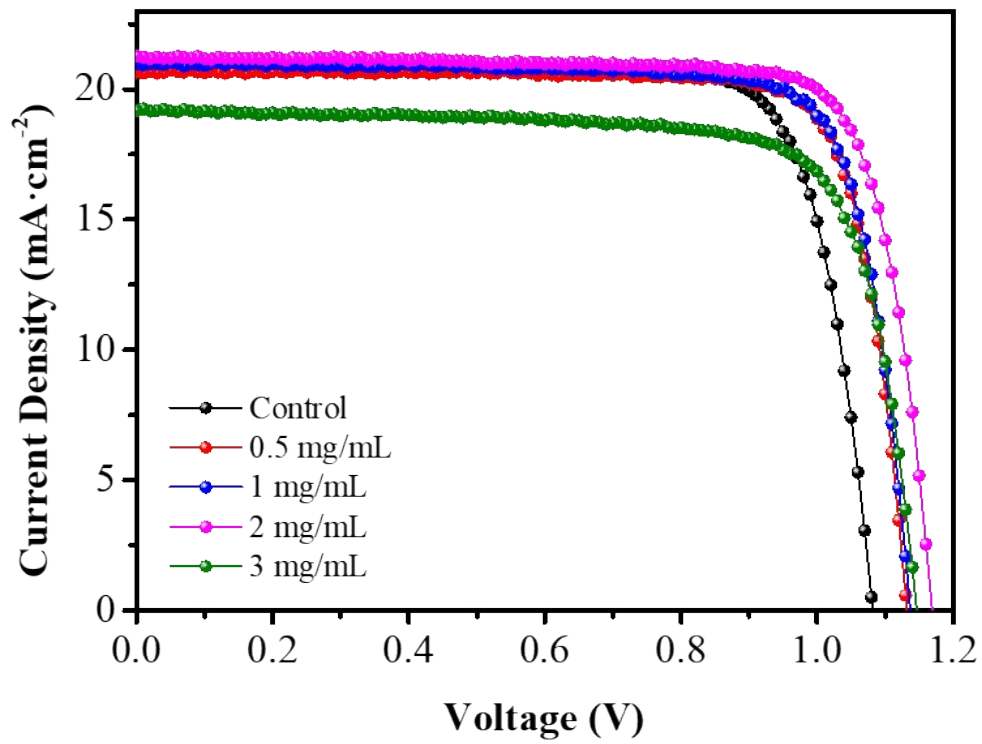

**Fig. S2**  $J$ - $V$  curves of WBG PSCs with different concentrations of ThHCl solution.

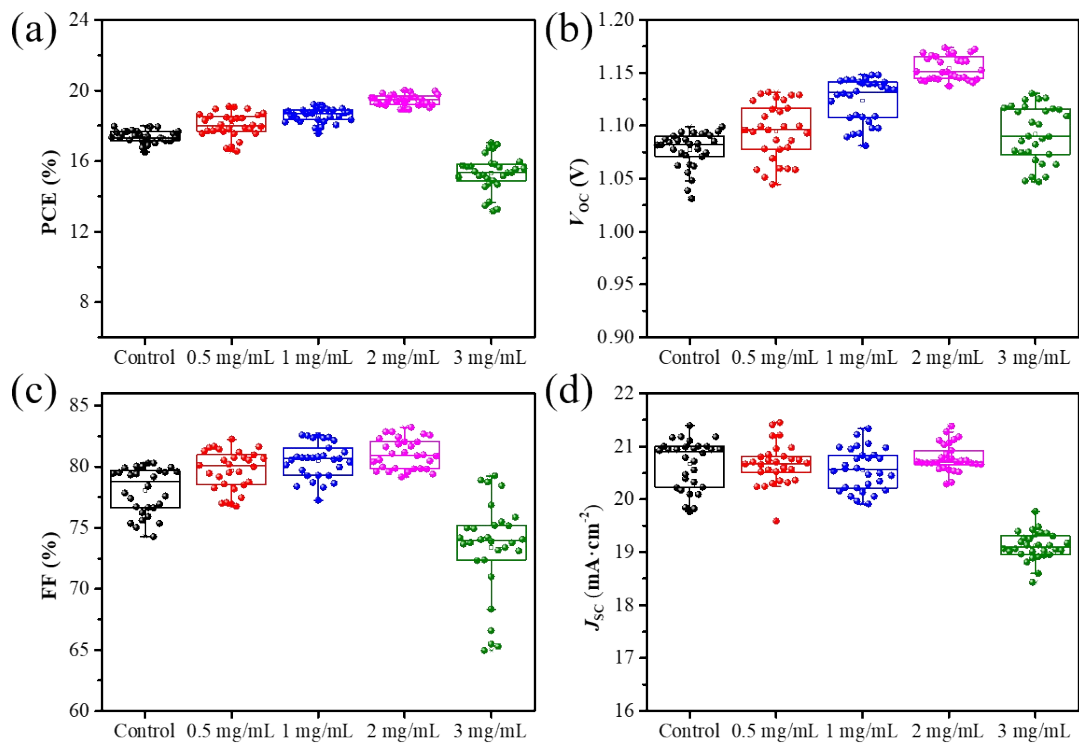

**Fig. S3** Performance optimization of WBG  $\text{FA}_{0.8}\text{Cs}_{0.2}\text{Pb}(\text{I}_{0.8}\text{Br}_{0.2})_3$  PSCs treated with different concentrations of ThHCl solution. (a) PCE, (b)  $V_{oc}$ , (c) FF, (d)  $J_{sc}$ .

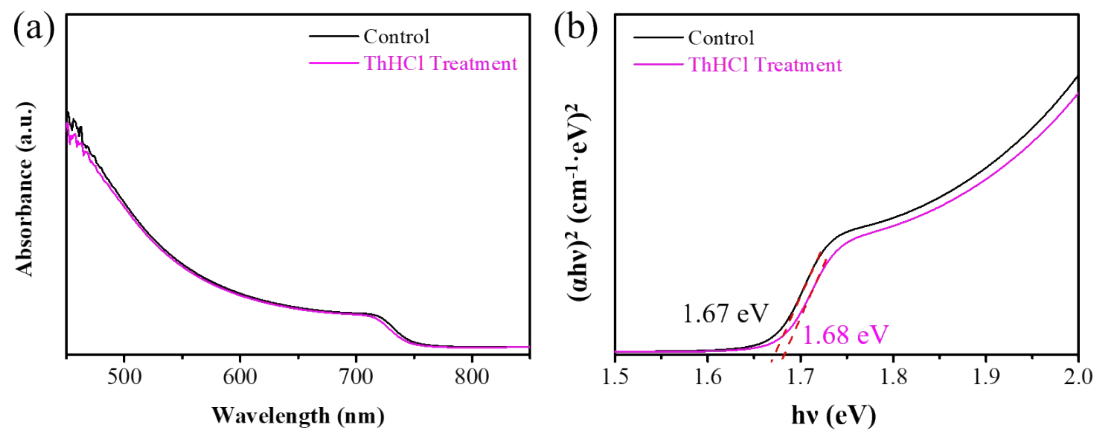

**Fig. S4** (a) Absorption spectra and (b) Tauc plots of WBG perovskite films with and without ThHCl treatment.

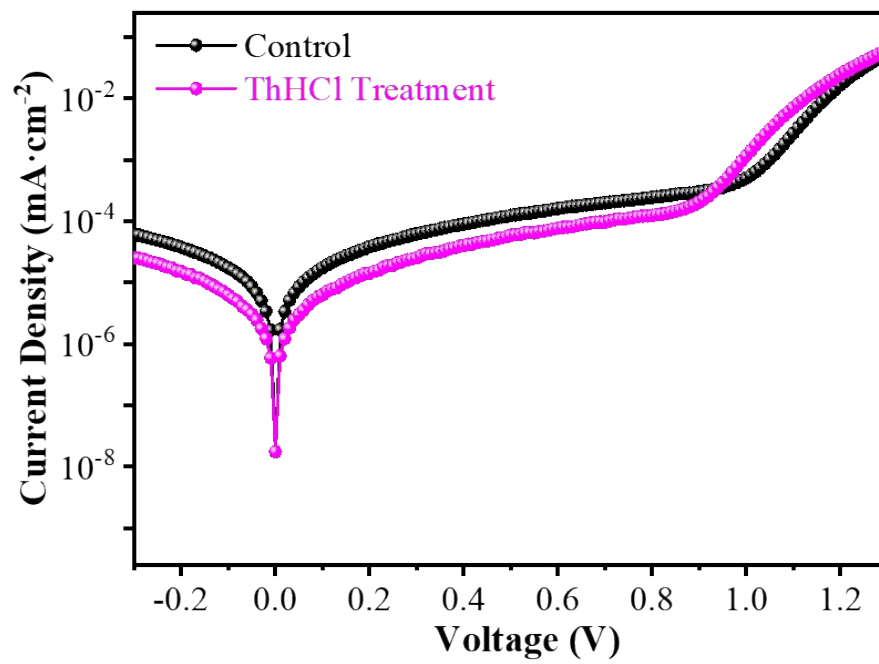

**Fig. S5** Dark  $J$ - $V$  curves of WBG PSCs with and without ThHCl treatment.



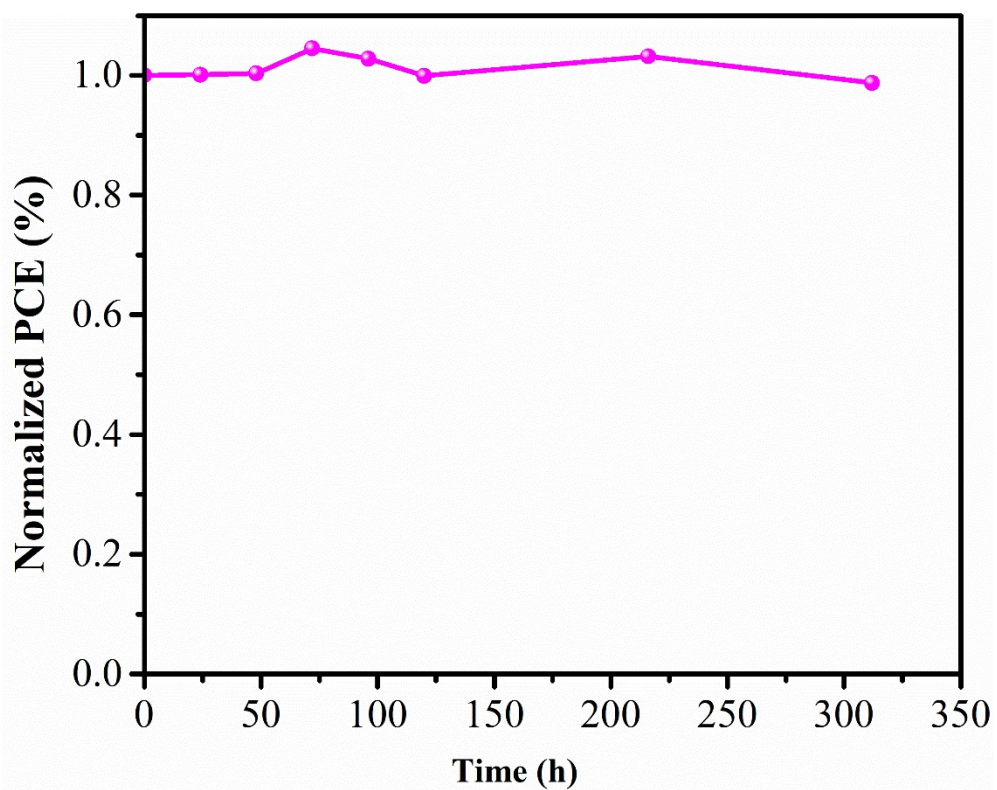

**Fig. S6** Long-term stability of WBG PSC with ThHCl treatment stored in N<sub>2</sub>-filled glovebox.

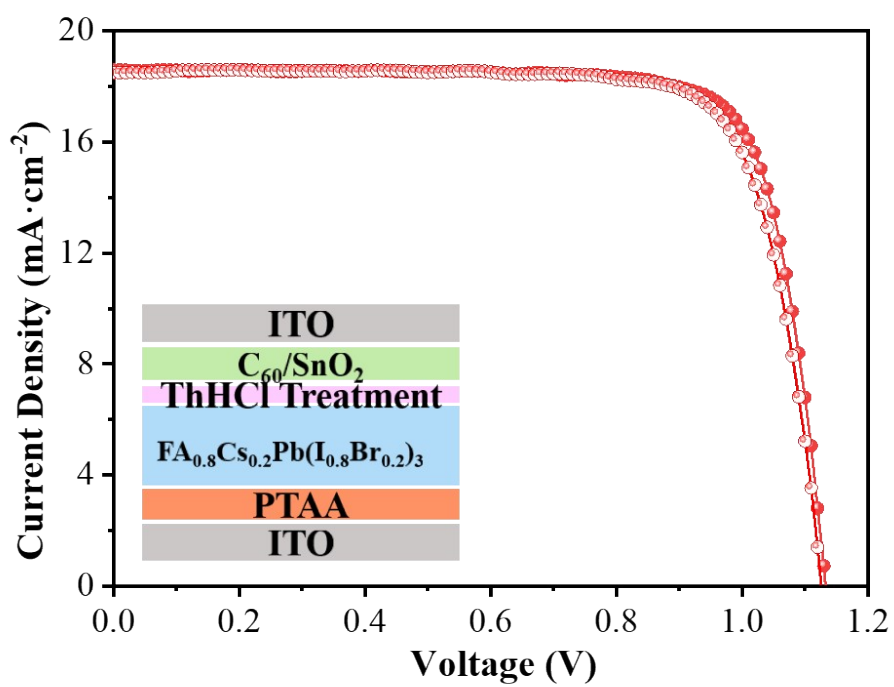

**Fig. S7**  $J$ - $V$  curves of semitransparent WBG PSC with ThHCl treatment. The inset is the corresponding device configuration.

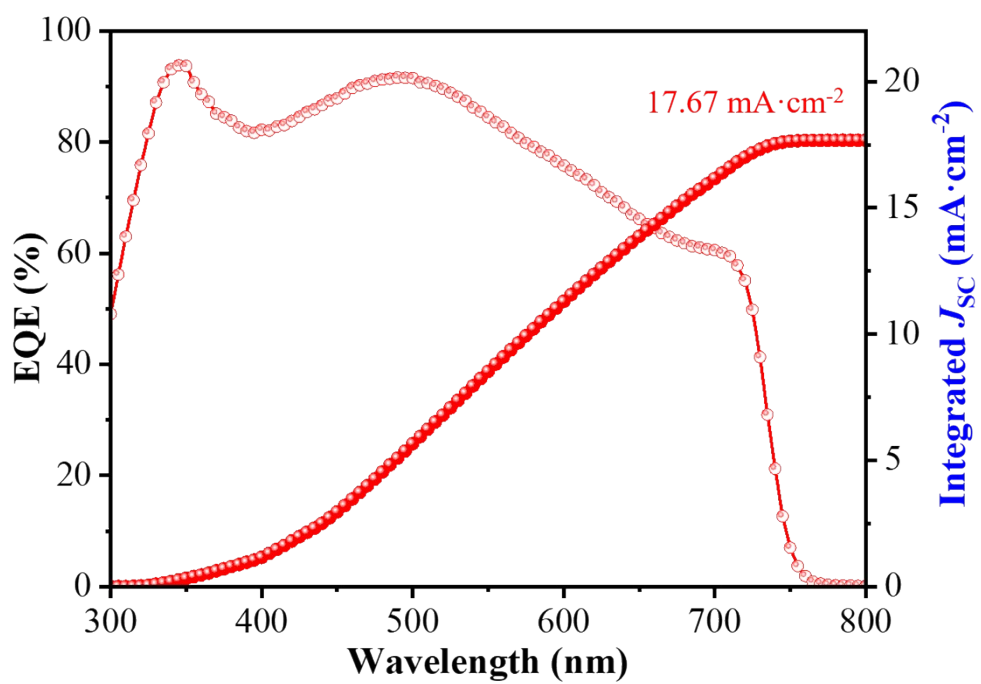

**Fig. S8** EQE spectrum and EQE-integrated  $J_{SC}$  of semitransparent WBG PSC with ThHCl treatment.

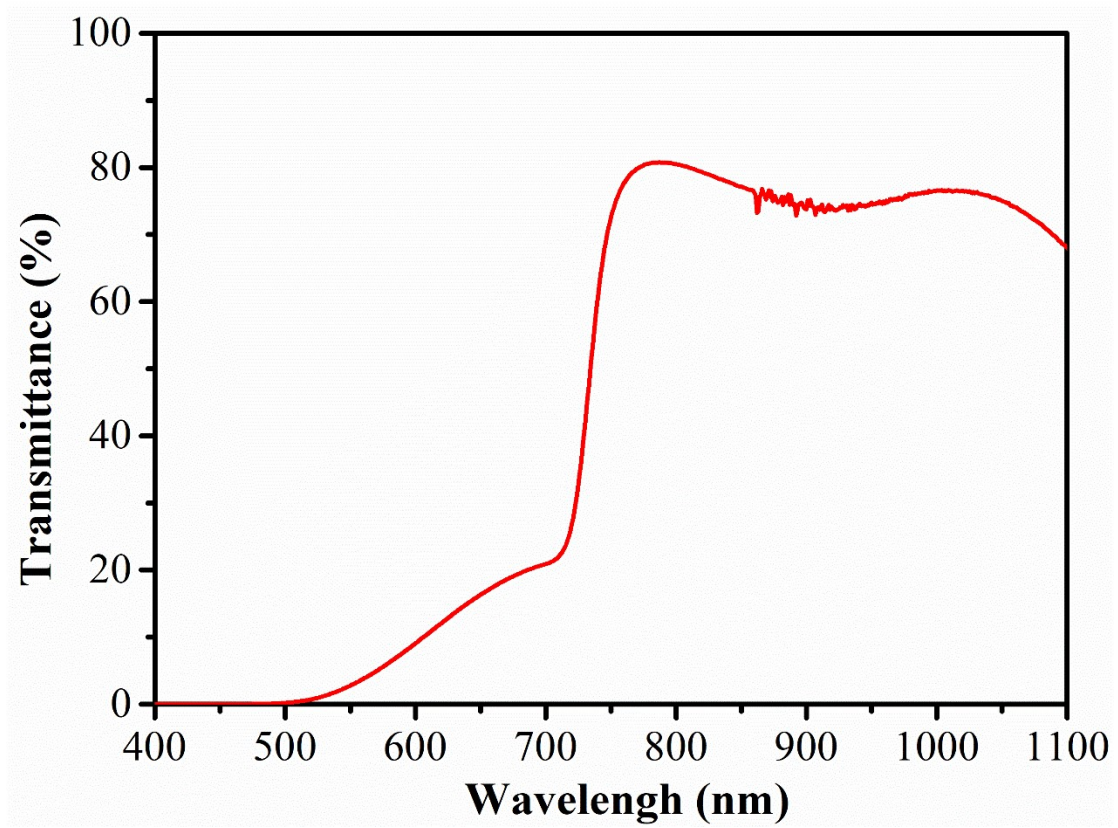

**Fig. S9** Transmittance spectrum of semitransparent WBG PSC with ThHCl treatment.

**Table S1** Photovoltaic parameters of FA<sub>0.8</sub>Cs<sub>0.2</sub>Pb(I<sub>0.8</sub>Br<sub>0.2</sub>)<sub>3</sub> WBG PSCs treated with different concentrations of ThHCl solution.

| Samples      |          | PCE (%)      | V <sub>oc</sub> (V) | FF (%)       | J <sub>sc</sub> (mA·cm <sup>-2</sup> ) |
|--------------|----------|--------------|---------------------|--------------|----------------------------------------|
| Control      | Average  | 17.37 ± 0.35 | 1.07 ± 0.02         | 78.07 ± 1.89 | 20.66 ± 0.46                           |
|              | Champion | 17.98        | 1.08                | 79.95        | 20.79                                  |
| 0.5<br>mg/mL | Average  | 18.03 ± 0.68 | 1.09 ± 0.03         | 79.69 ± 1.61 | 20.67 ± 0.37                           |
|              | Champion | 19.09        | 1.13                | 81.63        | 20.67                                  |
| 1<br>mg/mL   | Average  | 18.60 ± 0.41 | 1.12 ± 0.02         | 80.52 ± 1.44 | 20.56 ± 0.39                           |
|              | Champion | 19.21        | 1.14                | 80.55        | 20.97                                  |
| 2<br>mg/mL   | Average  | 19.43 ± 0.32 | 1.15 ± 0.01         | 81.04 ± 1.23 | 20.77 ± 0.26                           |
|              | Champion | 20.02        | 1.17                | 80.48        | 21.27                                  |
| 3<br>mg/mL   | Average  | 15.33 ± 1.01 | 1.09 ± 0.03         | 73.38 ± 3.87 | 19.12 ± 0.26                           |
|              | Champion | 16.97        | 1.14                | 77.23        | 19.17                                  |
